# Supplementary material
Source: Springer Nature journal article supplement (https://www.springermedizin.de/resource/supplementary/12916_2013_841_MOESM1_ESM.pdf/9598444)

## A The Data Cube

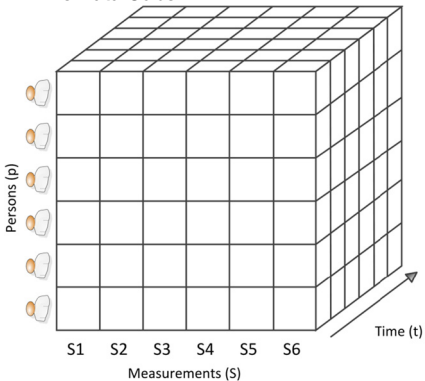

## B Latent Class Analysis

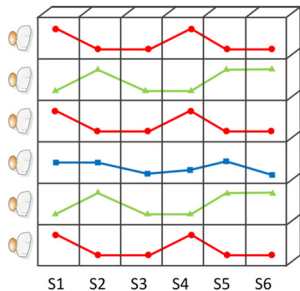

## C Factor Analysis

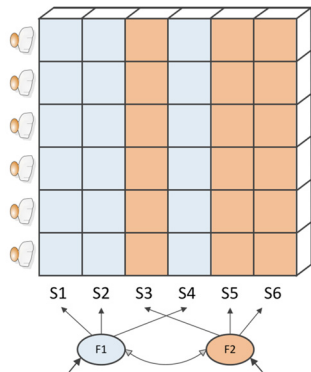

## D Growth Mixture Analysis

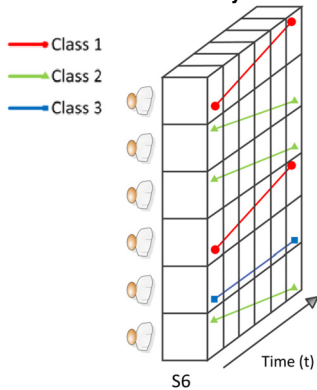

Supplement: MOESM1 [file 9598444]
